# Supplementary material
Source: publisher figshare collection journal article supplement (https://acs.figshare.com/ndownloader/files/8955607)
Supplement: Supplementary file 1 [file 8955607]

# Supporting Information:

## Donor-Acceptor Properties of a Single-Molecule Altered by On-Surface Complex Formation

Tobias Meier,<sup>\*,†</sup> Rémy Pawlak,<sup>†</sup> Shigeki Kawai,<sup>‡,¶</sup> Yan Geng,<sup>§</sup> Xunshan Liu,<sup>§</sup>  
Silvio Decurtins,<sup>§</sup> Prokop Hapala,<sup>||</sup> Alexis Baratoff,<sup>†</sup> Shi-Xia Liu,<sup>§</sup> Pavel Jelínek,<sup>||</sup>  
Ernst Meyer,<sup>†</sup> and Thilo Glatzel<sup>\*,†</sup>

<sup>†</sup>*Department of Physics, University of Basel, Klingelbergstr. 82, 4056 Basel, Switzerland.*

<sup>‡</sup>*International Center for Materials Nanoarchitectonics, National Institute for Materials  
Science, 1-1, Namiki, Tsukuba, Ibaraki 305-0044, Japan.*

<sup>¶</sup>*PRESTO, Japan Science and Technology Agency, 4-1-8 Honcho, Kawaguchi, Saitama  
332-0012, Japan.*

<sup>§</sup>*Department of Chemistry and Biochemistry, University of Bern, Freiestr. 3, 3012 Bern,  
Switzerland,*

<sup>||</sup>*Institute of Physics, Academy of Sciences of the Czech Republic, v.v.i., Cukrovarnická 10,  
162 00 Prague, Czech Republic.*

E-mail: tobias.meier@unibas.ch; thilo.glatzel@unibas.ch

**Keywords:** atomic force microscopy, scanning tunneling microscopy, fused donor-acceptor molecules, local contact potential difference, single-molecule, force spectroscopy, coordination.

## Distribution of different adsorption types

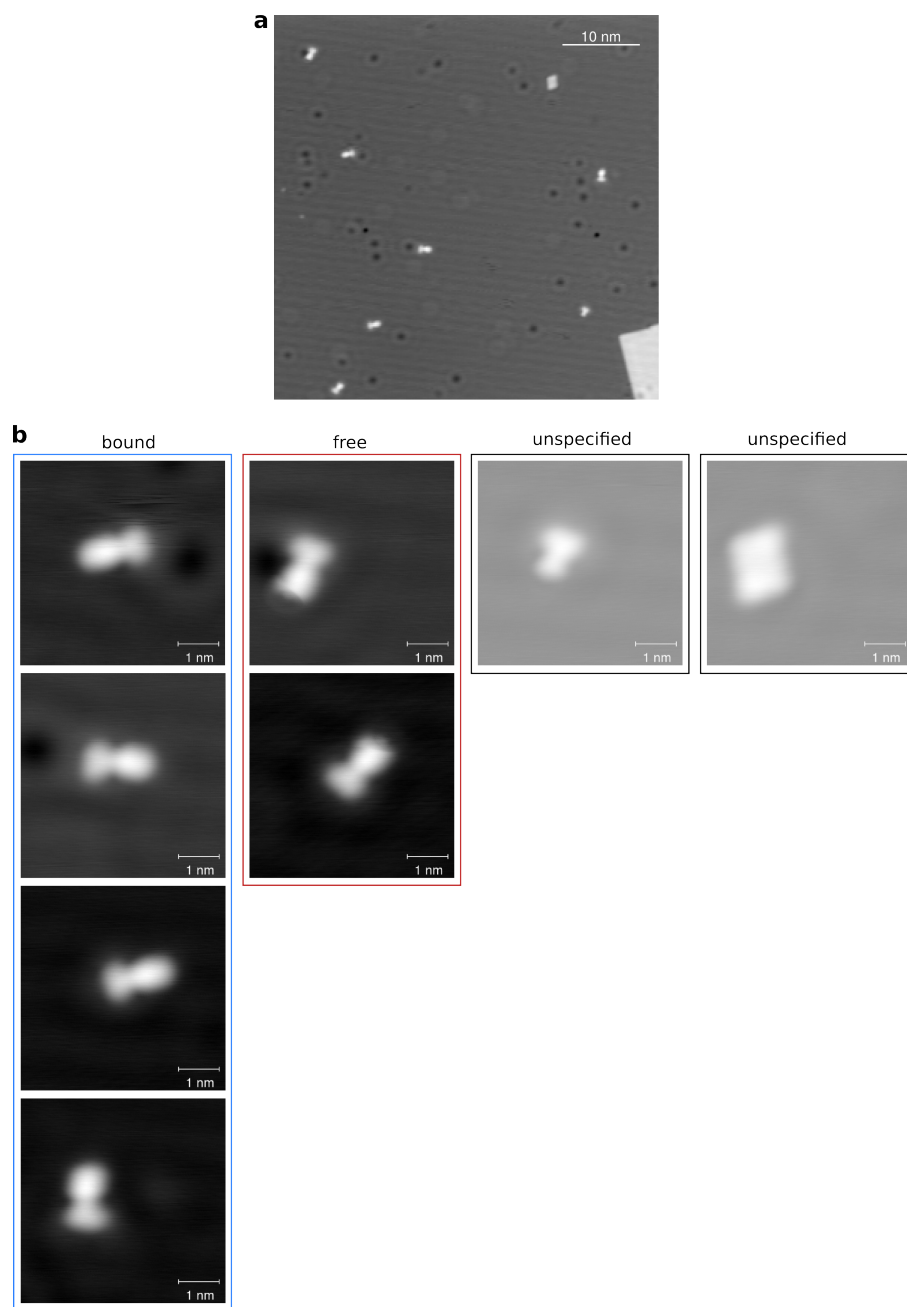

Figure S 1: Distribution of *bound* and *free* molecules of TTF-dppz adsorbed on 2 ML NaCl/Cu(111). **a**, The overview STM image shows a ratio of 2:1 between *bound* and *free* molecules which is representative to the observed distribution in general. **b**, STM images of *bound* and *free* adsorption types together with some rare unspecified adsorbates.

## Adsorption sites of TTF-dppz on NaCl (2ML) on Cu(111)

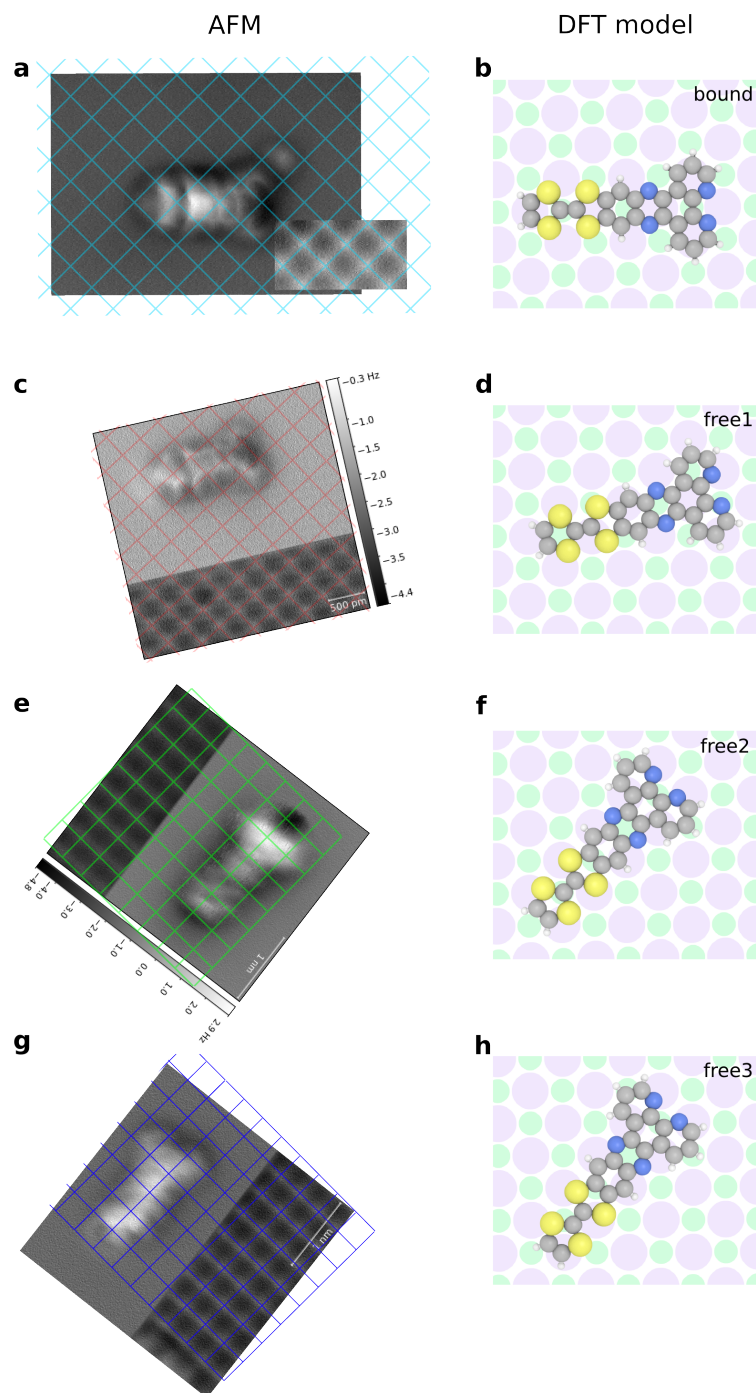

Figure S 2: **Adsorption sites of TTF-dppz.** Left: AFM images of single molecules together with NaCl lattices obtained from images of the substrate. Right: Corresponding models derived from DFT calculations.

## Calculated electronic properties of TTF-dppz

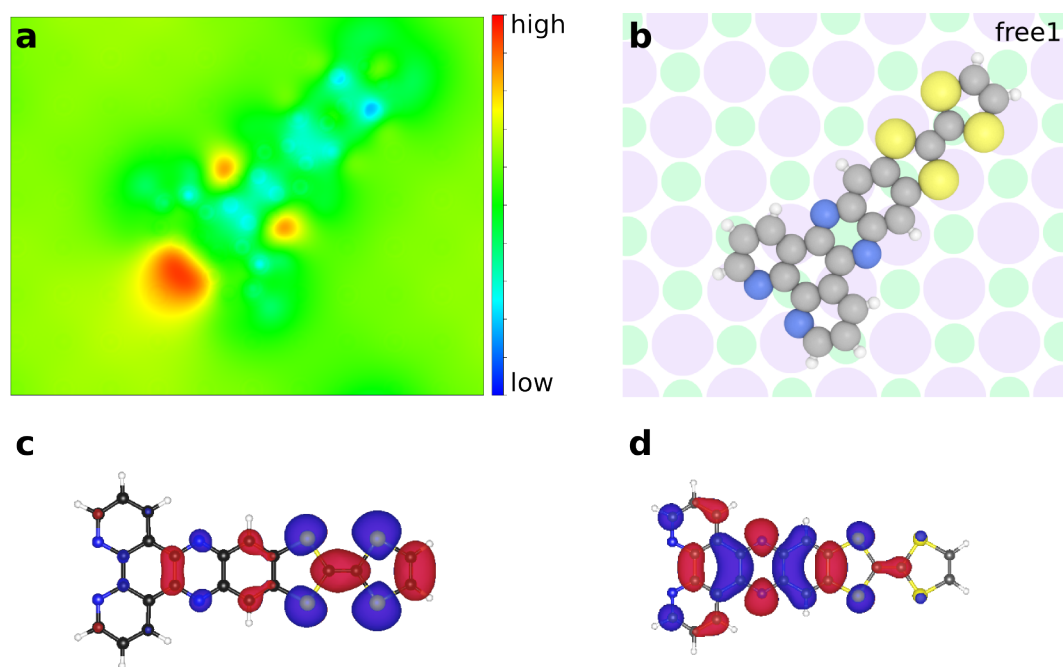

Figure S 3: **Electronic properties of TTF-dppz.** **a**, electrostatic potential and **b**, adsorption site of a *free* molecule. **c,d**, HOMO and LUMO of TTF-dppz in the gas phase. The molecular orbitals of TTF-dppz are spatially separated which is characteristic for an electron donor-acceptor molecule.

## Further details on the synthesis of TTF-dppz

**General** Air and/or water-sensitive reactions were conducted under Ar in dry, freshly distilled solvents.  $^1\text{H}$  NMR and  $^{13}\text{C}$  NMR spectra were recorded on a Bruker Avance 300 spectrometer at 300 MHz for  $^1\text{H}$  and 75.5 MHz for  $^{13}\text{C}$ . Chemical shifts are reported in parts per million (ppm) and are referenced to the residual solvent peak (DMSO- $\text{d}_6$ ,  $^1\text{H}$  = 2.5 ppm; THF- $\text{d}_8$ ,  $^{13}\text{C}$  = 67.57 ppm). Coupling constants (J) are given in hertz (Hz) and peak multiplicities are described in the following way: s, singlet; d, doublet. High-resolution Mass Spectra (HRMS) were recorded with ESI (electrospray ionization) on a Thermo Scientific LTQ Orbitrap XL in the positive mode.

**Materials** 6-(1,3-dithiol-2-ylidene)-[1,3]dithiolo[4,5-*f*]-2,1,3-benzothiadiazole was synthesized according to the literature procedure<sup>1</sup>. Tetrahydrofuran (THF) was stirred over sodium/benzophenone and then distilled immediately prior to use for anhydrous reactions. Unless stated, all other reagents were purchased from commercial sources and used without additional purification.

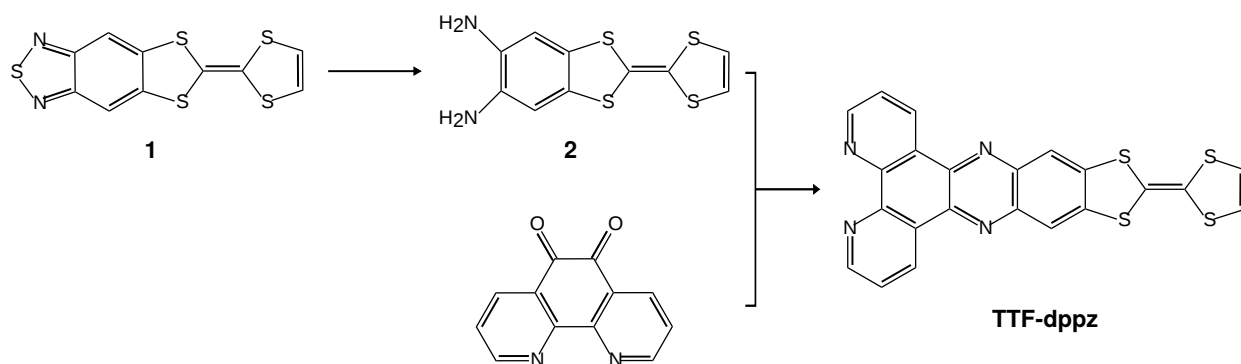

Figure S 4: **Synthesis of TTF-dppz.**

## REFERENCES

- (1) Geng, Y.; Pfattner, R.; Campos, A.; Hauser, J.; Laukhin, V.; Puigdollers, J.; Veciana, J.; Mas-Torrent, M.; Rovira, C.; Decurtins, S.; Liu, S.-X. A Compact Tetrathiafulvalene-Benzothiadiazole Dyad and Its Highly Symmetrical Charge-Transfer Salt: Ordered Donor  $\pi$ -Stacks Closely Bound to Their Acceptors. *Chem. - Eur. J.* **2014**, *20*, 7136-7143.
